# Supplementary material for: Repurposed anti-cancer epidermal growth factor receptor inhibitors: mechanisms of neuroprotective effects in Alzheimer’s disease
Source: PubMed Central journal article supplement — Neural Regen Res. 2022 Feb 8;17(9):1913–8. doi: 10.4103/1673-5374.332132 (PMC8848623; doi:10.4103/1673-5374.332132), 2022-02-08
Supplement: NRR-17-1913_Suppl1.pdf [file NRR-17-1913_Suppl1.pdf]

**Additional Table 1 Summary of the effect of epidermal growth factor receptor (EGFR) modulation in different in vivo and in vitro models of Alzheimer's disease**

| EGFR modulation                                                                    | Subjects                                                                                                  | Main outcomes                                                                                                                                                | References          |
|------------------------------------------------------------------------------------|-----------------------------------------------------------------------------------------------------------|--------------------------------------------------------------------------------------------------------------------------------------------------------------|---------------------|
| Overexpression of EGFR                                                             | 5-month-old female fruit flies                                                                            | Mild impact on memory performance.                                                                                                                           | Chiang et al., 2010 |
| Co-overexpression of EGFR and A $\beta$ 42                                         | 5-month-old female fruit flies                                                                            | Synergetic effect on Memory loss as proved by behavioral tests accompanied by hyperactivation of PI3K/Akt pathway.                                           | Chiang et al., 2010 |
| Oral administration of 0.01 mg/kg/day Gefitinib (EGFR inhibitor) for 7 days        | 8-month old Tg(APP <sup>swe</sup> .PSEN1 <sup>de9</sup> ) double transgenic mice                          | Memory loss was rescued as indicated by better performance in the Morris water maze test.                                                                    | Wang et al., 2012   |
| Oral administration of 10 mg/kg/day Gefitinib (EGFR inhibitor) for 18 days         | 8-month old Tg(APP <sup>swe</sup> .PSEN1 <sup>de9</sup> ) double transgenic mice                          | Decreased hippocampal expression of p-EGFR <sup>Tyr1068</sup> , the domain for binding with Grb2 that results in activation of MAPK.                         | Wang et al., 2012   |
| 10 <sup>-5</sup> mg of gefitinib or erlotinib                                      | COS-7 cells transfected with human wild-type EGFR.                                                        | Decreased levels of A $\beta$ 42 oligomers-activated EGFR as indicated by the western blotting technique.                                                    | Wang et al., 2012   |
| Treatment with anti-EGFR for 48 hours using co-immunoprecipitation.                | COS-7 cultured cells were co-transfected with genes encoding a human EGFR <sup>wt</sup> and A $\beta$ 42. | A $\beta$ 42 were drawn down with EGFR, proving the binding of EGFR with amyloid proteins                                                                    | Wang et al., 2012   |
| 0.01, 0.1, 1, and 10 $\mu$ g/mL of erlotinib or gefitinib for one week             | 10-day-old male fruit flies                                                                               | All dose regimens significantly improved memory. This neuroprotective effect was dose-dependent for gefitinib while it was not dose-dependent for erlotinib. | Wang et al., 2012   |
| 100 $\mu$ g/mL of<br>*JKF-006<br>*JKF-011<br>*JKF-027                              | Human EGFR expressing COS-7 cell                                                                          | Reversed a 10 $\mu$ g/mL A $\beta$ 42-mediated activation of human EGFR expressing COS-7 cell.                                                               | Wang et al., 2012   |
| *58 mg/kg JKF-006<br>*14.4 mg/kg JKF-011<br>*55 mg/kg JKF-027<br>* 40 mg/kg JKF-01 | 6–8-month-old double transgenic rats                                                                      | Amelioration of memory loss conformed by Morris water maze test.                                                                                             | Wang et al., 2012   |
| -----                                                                              | 10-day-old Pan-neuronal expressing human A $\beta$ 42 fruit fly (exemplifying early stage of AD)          | EGFR expression is elevated, and A $\beta$ 42 stimulates EGFR/PI3K, distorts the synaptic                                                                    | Wang et al., 2013   |

|                                                                                                                                                 |                                                                                                    |                                                                                                                                                                                                                                                                                                                           |                      |
|-------------------------------------------------------------------------------------------------------------------------------------------------|----------------------------------------------------------------------------------------------------|---------------------------------------------------------------------------------------------------------------------------------------------------------------------------------------------------------------------------------------------------------------------------------------------------------------------------|----------------------|
|                                                                                                                                                 |                                                                                                    | plasticity, and eventually results in memory impairment.                                                                                                                                                                                                                                                                  |                      |
| -----                                                                                                                                           | 35-day-old Pan-neuronal expressing human A $\beta$ 42 fruit fly (exemplifying late stage of AD)    | A $\beta$ 42 leads to a pronounced decrease in EGFR which ultimately causes neuronal degeneration.                                                                                                                                                                                                                        | Wang et al., 2013    |
| -----                                                                                                                                           | APP/PS1 8-month-old double transgenic mice                                                         | The ratio of (p-EGFR/EGFR) is increased relative to wild-type mice                                                                                                                                                                                                                                                        | Wang et al., 2013    |
| *CL-387,785 (HER1/2 dual inhibitor)<br>*AG825 (HER-2-selective inhibitor)<br>*Gefitinib (EGFR-selective inhibitor)<br>* Lapatinib (HER1/2 dual) | *HEK293-derived cell line (CG)<br><br>*HEK293-derived cell line (NG)                               | Only CL-387,785 but not AG825, gefitinib, or lapatinib blocked the processing of APP in CG cells but not in NG cells.                                                                                                                                                                                                     | Wang et al., 2017    |
| CL-387,785 (HER1/2 dual inhibitor)                                                                                                              | *HEK293 cells that overexpressed C99-YFP<br>*double transgenic mice                                | Reduction in p62 accompanied by an increase in the LC3-II/LC3-I ratio suggestive of autophagy induction.                                                                                                                                                                                                                  | Wang et al., 2017    |
| Afatinib (selective EGFR inhibitor)                                                                                                             | *Primary cultured astrocytes<br>*CTX-TNA2 cells subjected to oxygen and glucose deprivation (OGD). | Afatinib blocked Akt and ERK pathways. Furthermore, afatinib amended the OGD-induced increase in GFAP, NO, cyclooxygenase II, inducible nitric oxide synthase authenticating anti-inflammatory effects of EGFR inhibition.                                                                                                | Chen et al., 2019    |
| C56 (selective EGFR inhibitor)                                                                                                                  | Neuronal cells treated with H <sub>2</sub> O <sub>2</sub> or 6-hydroxydopamine                     | Selective EGFR inhibitor C56 inhibited 6 OHDA-mediated neuronal apoptosis and axonal degeneration.                                                                                                                                                                                                                        | Cao and Fang, 2015   |
| Lapatinib ditosylate (dual EGFR/HER2 inhibitor)                                                                                                 | D-galactose/ovarectomized rats                                                                     | Lapatinib ameliorated behavioral performance as indicated by Morris water maze, novel object recognition test. It suppressed EGFR, HER-2, A $\beta$ 1-42, p-tau, GFAP, TNF- $\alpha$ , P38 MAPK, GluR-II, and mTOR. While activating the prosurvival pathway; PI3K/AKT/GSK-3 $\beta$ and neuroprotective nitrite content. | Mansour et al., 2021 |
| Ibrutinib (an EGFR inhibitor)                                                                                                                   | *5xFAD mice<br>* PS19 mice                                                                         | Ibrutinib inhibited A $\beta$ , p-tau, p-CDK-5, neuroinflammation, along with induction of dendritic spinogenesis via activation of PI3K.                                                                                                                                                                                 | Lee et al., 2021     |

**REFERENCES**

- Cao X, Fang Y (2015) Transducing oxidative stress to death signals in neurons. *J Cell Biol* 211:741-743.
- Chen YJ, Hsu CC, Shiao YJ, Wang HT, Lo YL, Lin AMY (2019) Anti-inflammatory effect of afatinib (an EGFR-TKI) on OGD-induced neuroinflammation. *Sci Rep* 9:2516.
- Chiang HC, Wang L, Xie Z, Yau A, Zhong Y (2010) PI3 kinase signaling is involved in A $\beta$ -induced memory loss in *Drosophila*. *Proc Natl Acad Sci U S A* 107:7060-7065.
- Lee H, Jeon SG, Kim J, Kang RJ, Kim S, Han K, Park H, Kim K, Sung YM, Nam HY, Koh YH, Song M, Suk K, Hoe H (2021) Ibrutinib modulates A $\beta$ /tau pathology, neuroinflammation, and cognitive function in mouse models of Alzheimer's disease. *Aging Cell* 20:e13332.
- Mansour HM, Fawzy HM, El-Khatib AS, Khattab MM (2021) Lapatinib ditosylate rescues memory impairment in D-galactose/ovariectomized rats: Potential repositioning of an anti-cancer drug for the treatment of Alzheimer's disease. *Exp Neurol* doi:10.1016/j.expneurol.2021.113697.
- Wang BJ, Her GM, Hu MK, Chen YW, Tung YT, Wu PY, Hsu WM, Lee H, Jin LW, Hwang SPL, Chen RPY, Huang CJ, Liao YF (2017) ErbB2 regulates autophagic flux to modulate the proteostasis of APP-CTFs in Alzheimer's disease. *Proc Natl Acad Sci U S A* 114:E3129-3138.
- Wang L, Chiang HC, Wu W, Liang B, Xie Z, Yao X, Ma W, Du S, Zhong Y (2012) Epidermal growth factor receptor is a preferred target for treating Amyloid- $\beta$ -induced memory loss. *Proc Natl Acad Sci U S A* 109:16743-16748.
- Wang L, Liang B, Zhong Y (2013) Reduced EGFR level potentially mediates the A $\beta$ 42-induced neuronal loss in transgenic fruit fly and mouse. *Protein Cell* 4:647-649.
